# Supplementary material for: Continuous deep brain stimulation of the nucleus accumbens reduces food intake but does not affect body weight in mice fed a high-fat diet
Source: Springer Nature journal article supplement (doi:10.1038/s41598-023-45511-7), 2023-11-02
Supplement: MOESM1 [file 41598_2023_45511_MOESM1_ESM.pdf]

# **Continuous deep brain stimulation of the nucleus accumbens reduces food intake but does not prevent diet-induced obesity in mice.**

Hounchonou F.H.<sup>1,2,4</sup>, Tang Hui<sup>1,2</sup>, Paulat Raik<sup>3</sup>, Kühn Andrea<sup>3</sup>, Spranger Joachim<sup>1,2</sup>, van Riesen Christoph<sup>3,5</sup>, Maurer Lukas<sup>1,2,\*</sup>

## **Supplementary material**

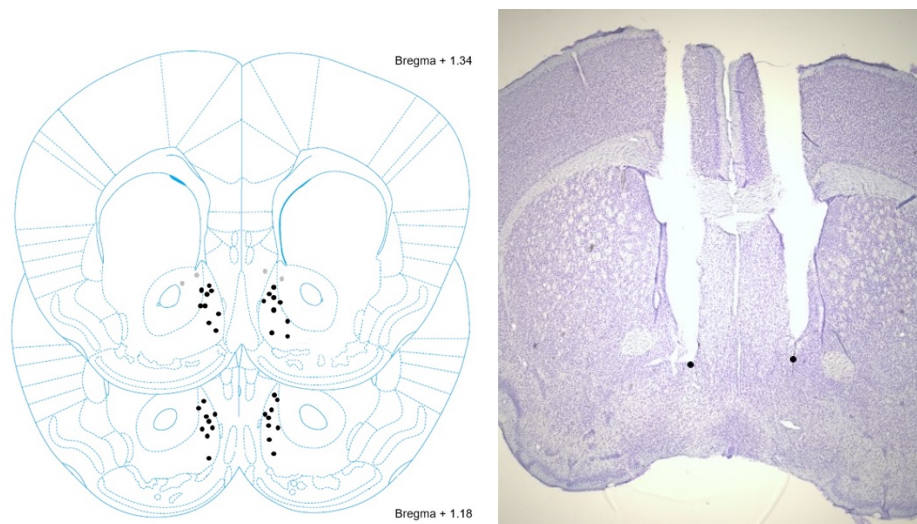

Electrode location: The black points on the right picture show the top of the electrode in the Nac Shell according to the mouse brain atlas (Paxinos, G. & Franklin, K. B. Paxinos and Franklin's the mouse brain in stereotaxic coordinates. Academic press, 2019).
